# Supplementary material for: Assessing the Seasonal Evolution of Snow Depth Spatial Variability and Scaling in Complex Mountain Terrain
Source: Copernicus journal article supplement (doi:10.5194/tc-2022-96), 2022-06-03
Supplement: Supplementary file [file tc-2022-96-AC2-supplement.pdf]

## Response to Referee Comments

**Submission Title:** *Assessing the Seasonal Evolution of Snow Depth Spatial Variability and Scaling in Complex Mountain Terrain*

**Submission Number:** *tc-2022-96*

Thank you for your time providing a thorough review of this manuscript. We appreciate your feedback on the manuscript and the relevance you find in the work. We addressed each comment and provided an updated version of the manuscript as well as responses to each comment below.

### **RC2 (Anonymous) Major Points:**

1. It is not clear why spherical models are used. There are other models which can fit omnidirectional variograms. Please check references, test other models (log linear models, exponential...) and justify why you use one particular model. Similarly I think the experimental omnidirectional variograms must be shown in the manuscript to justify the fit with different models.

We chose to use spherical models because they are well suited for three-dimensional spatial analysis, are commonly used in similar variogram analysis (making our work more comparable to previous literature) and fit the majority of our 170 experimental variograms, especially in the complex terrain of the Hourglass. Given that we calculated and compared 170 different variograms, we needed to pick one model to compare each of them with. Therefore, the spherical fit was the right choice overall despite the possibility of better fits with different models for some of the variograms. We added clarification and citations to the manuscript (lines 241-243). We also included a figure of the timeseries of experimental variograms to the appendix for reference (Figure A2).

2. Methods section needs further details on how variograms are computed (references, mathematical expressions). Moreover, there are some methodological issues that must be corrected in the analysis. For instance, the maximum distance considered on variogram computation cannot be larger than half the maximum points pair distance (Sun et al., 2006 <https://doi.org/10.1080/01431160600676695>). Methods section needs a full description of the variables later analyzed (range, nugget, sill) in view to the vocabulary of previous works. Finally why scale breaks are not computed?).

We added a formula and description of how our variograms are computed as well as the definitions of the key components of a variogram (sill, range and nugget) to the manuscript (lines 219 – 231). The maximum distance in our experimental variogram calculations was 1/3 the length of the diagonal of the box spanning the data (R “gstat” package - <https://cran.r-project.org/package=gstat>), rather than the maximum distance of point pairs as described previously (line 244). We clarified this in Sec. 3.5. Scale breaks were considered in initial questioning but would require additional fractal analysis (outside the scope of this paper) and were not calculated. The “scale breaks” verbiage was changed to “spatial scales of snow depth variability” in the only location it was mentioned in reference to our work (line 16) but is still included in reference to other works which did calculate and define the scale breaks.

3. I encourage manuscript authors to show the results for all resolutions and not only for 0.5 m. Please include values of table 2 for all resolutions. Also include results of figure 7 for all resolutions.

Table 2 has been updated with mean values for each resolution and location. Figure 8 (formerly Figure 7) has been updated to include all resolutions.

4. From the results shown in the manuscript, I consider it is not justified this conclusion: “We found that spatial resolutions greater than 0.5 m do not capture the complete patterns of snow depth spatial variability within complex mountain terrain”. For some dates this is true but in most of them 1 m resolution results (figure 5) is quite close to 0.5, 0.025, 0.1m..., and in some cases also 2.5m. This point is no convincing from my understanding. Additionally, a steep couloir is a very characteristic “complex mountain terrain”, so I think it is not possible to extend this conclusion to “all complex mountain terrain”. Please change conclusions conveniently.

Indeed, most dates’ snow depth spatial variability patterns are captured by 1 m resolution sampling strategies quite well, but we clearly see that it doesn’t capture all instances of spatial variability at our site. Therefore, we recommend the coarsest resolution which captures all finer resolution patterns of spatial variability, 0.5 m, as a minimum sampling resolution. We agree that complex terrain is challenging to effectively prove as broadly representative and have clarified our language throughout the paper to specify the complex terrain within our study site (lines 20, 89, 396, 407, 428, 456, 469, 472).

#### **RC2 Minor Points:**

Line 15: “We produced 12 snow depth maps...” I think here and all long the manuscript there is an error. Figures show 11 snow depth maps. Maybe authors refer here to 12 UAS flights (including the snow-free flight), from which 11 snow depth maps were derived. Correct conveniently in the manuscript (introduction, discussion, conclusion...

Thank you for catching this typo. Revised to 11 snow depth maps.

Line 50-55: I consider that, here, it is needed to state slope limitations of satellite-derived snow maps, which cannot be obtained when the slope is above a threshold value. Please verify this threshold in the references and include it.

We added “Yet the accuracy of DEMs produced through satellite imagery and stereoscopic processing are known to suffer on slopes steeper than 35°, common in high-relief mountain terrain (Lacroix, 2016; Shean et al., 2016, Deschamps-Berger et al., 2020).” (lines 53-55).

Line 81: Change “sparse temporal observations” to “more sparse temporal observations” and include other works analyzing the snow depth spatial variability from UAS/LiDAR systems. Here the links to some examples: <https://doi.org/10.1029/2020WR027343>, <https://doi.org/10.1016/j.jhydrol.2019.124046>

We added “more” to the sentence and additional citations (line 84).

Line 113-119: Three AWS are described here, however in Figure 2 only data from Brackett meadow AWS are included. Why you describe the other two? Remove the description of AWS not used in your research please.

Updated to only include one AWS (lines 118-121). We originally described the other two AWS since they are used to report Bridger Bowl Ski Area's average annual snowfall and were useful for observing hourly meteorological data during data collection.

Line 132: The grid pattern at 50 m above ground was respected for the entire flight or this elevation was programmed in the UAS control software in view to the elevation data of this later software? Please specify.

The grid pattern at 50 m AGL constant height was pre-programmed into the UAS flight control software to follow terrain from an input 1 m resolution DSM captured prior to winter flights. We have updated the text with additional clarification (line 135).

Line 133: change units of ground sampling distance to the cm/pixel as this is the most extended unit used in UAS works.

Updated to 2 cm (line 136). We chose to use only meters for consistency throughout the paper but agree that ground sampling distance is most easily compared in cm/pixel.

Line 139: How many points of the 25 ground control points were included in the partial selection? Were used, 1 to 3, 5 to 25, at least 7? This information is relevant for further error assessment.

We typically ended up using between 3 and 10 points for each model and updated the text to include this (line 142).

Line 140: Similarly to previous point, how many surveyed snow depth points were deployed each date? Please include this information.

We collected manual snow depth measurements at 4 or more locations at deployed 1 m<sup>2</sup> markers each field day (lines 144 and 176).

Line 153: Include the horizontal and vertical RMSE of image geolocation after PPK processing. Later, include details on the RMSE values obtained for the GCPs and the number of GCPs available for validation each date.

We have added a table of after-PPK processed image location differences (Table A1).

Line 163: Also Include references to other works evaluating RTK and GCP accuracies in snow dominated areas: Eberhard et al., 2021 (<https://doi.org/10.5194/tc-15-69-2021>) and Revuelto et al., 2021 (<https://doi.org/10.1029/2020WR028980>)

We previously mentioned Revuelto et al., 2021 in regards to RTK and GCP accuracies but have added the Eberhard et al., 2021 citation to the sentence as well (lines 165-166).

Line 164: Did you obtain the snow depth distribution directly subtracting regular grids from snow free and snow covered DSMs?, Were these differences computed with 3D point clouds and then rasterized to the distinct spatial resolutions? Please detail this. If 3D point clouds were directly subtracted detail the software used.

As stated in the methods (lines 167-169), we simply used regular aligned grid subtraction of the original snow-free from snow-covered 2 cm resolution DSMs to find our snow depths. The DSMs were derived from Agisoft Metashape processing and the DSM differencing was completed in R. We did not use 3D point clouds for differencing.

Line 166: Please give an idea of what unrealistic snow depths are for you. I guess these are negative values, too high values...

We added clarification “Unrealistic snow depths are negative snow depth values and values filtered by expert judgement” (line 172).

Line 174-177: I think that the manual avalanche crown profile data are not used in this research so I do not see any need to include this information. I would remove it.

We use the avalanche crown profile as a point snow depth measurement and it is the single validation measurement we have from the upper reaches of the Hourglass during the season (lines 287-290).

Line 195: I think manuscript authors are working with regular grids, but this is not clearly stated in the manuscript. I consider it is needed to clearly state this in the first sentence of the DSM detrending section.

We added clarification “...we detrended each snow depth DSM with regular grids to focus analysis on the residual surfaces...” (line 201).

Section 3.5 Variogram calculation must be detailed as this is one the main analysis of this work. Include suitable references here and the mathematical expressions to compute them. I think it is unbalanced the details given in section 3.6 for computing the coefficient of variation whereas no details are given for variogram calculation.

We added a formula and description of how our variograms are computed as well as the definitions of the key components of a variogram (sill, range and nugget) to the manuscript (lines 222-233).

Line 213: Why spherical models? there are other models that can be tested and fitted to the variogram. See Mendoza et al., 2020 (<https://doi.org/10.1029/2020WR027343>). Indeed there are other models which fit better the snow behavior depending the spatial scale (see Noriaki et al., 2019 <https://doi.org/10.1002/hyp.13415>, Mendoza et al., 2020 <https://doi.org/10.1029/2020WR028480>) . This point (also referred in major points section) must be fully addressed and justified.

We chose to use spherical models because they are well suited for three-dimensional spatial analysis, are commonly used in similar variogram analysis (making our work more comparable to previous literature) and fit the majority of our 170 experimental variograms, especially in the complex terrain of the Hourglass. Given that we calculated and compared 170 different variograms, we needed to pick one model to compare each of them with. Therefore, the spherical fit was the right choice overall despite the possibility of better fits with different models for some of the variograms. We included additional clarification and citations to the manuscript (lines 241-243).

Line 218: It is not possible to compute variograms till the maximum distance of the study area, it must be half of the maximum point pairs distance (Sun et al., 2006 <https://doi.org/10.1080/01431160600676695>). This is an important point that must be also addressed in addressed in results and methods section.

The maximum distance in our experimental variogram calculations was 1/3 the length of the diagonal of the box spanning the data (R “gstat” package - <https://cran.r-project.org/package=gstat>), rather than the maximum distance of point pairs as described previously. We clarified this in Sec. 3.5. and updated the manuscript (line 244).

Line 223: Include details on how the “average” variogram is computed. Later, in results section (figure 4). The seasonally averaged variogram is shown. Nonetheless no details on how is computed are included (each point is the average of semivariances for all resolutions?)

Updated text with the addition of: “We applied a local polynomial regression (LOESS) fit to spherical models to produce the seasonally averaged resolution specific variograms (R Core Team, 2021)” (lines 248-250).

Line 235: The n=70 snow depth measurements include all observations? This is, following Lopez-Moreno (et al., 2011),  $70/(4 \text{ corners} + \text{center obs}) = 14$  locations? Or the 70 snow depth observations repeated this procedure in 70 distinct locations? Please clarify. Where these locations constant all acquisition dates?, always the same number?

70 manual snow depths measurements were collected throughout the entire season with 5 individually probed snow depths collected at each marker (4 corners + 1 center = 350 total individual measurements). The 70 snow depth observations were each randomly distributed throughout the avalanche-safe lower areas of the study site. We deployed and measured at least 4 snow depth validation markers each field day in random locations. The manuscript has been updated to clarify this (lines 174-179, 286-287)

Also an overview of the locations of these validation locations would help to potential readers where did you validate your UAV observations. I encourage manuscript authors to include one snow depth distribution map (of one selected date, maybe the seasonal maximum) to allow the reader to see the snow distribution characteristics. Include in this new figure the point snow depth measurement locations.

We added a complete timeseries of detrended snow depth maps of the Hourglass (Figure A3) and meadow (Figure A4) that clearly demonstrate the distribution of snow depths throughout the research sites. We state that “We collected all validation snow depth measurements, except the crown profile of the 26 February 2020, avalanche, in the lower elevations of the Hourglass and throughout the meadow in order to avoid exposure to snow avalanches” and clarify that “This assessment is not a comprehensive assessment of error because our validation snow depths were primarily collected at random locations in the safe lower slopes, and this assessment is therefore biased towards comparisons of measurements in the meadow” (lines 283-290).

Line 268: I think the experimental variogram must be included in this comparison. This is, show both, the spherical fit variogram and the variogram derived from true snow depth observations. This might demonstrate that spherical model fits the experimental variogram. This is related with the major point of models tested.

We added a figure of the timeseries of experimental variograms to the appendix for reference (Figure A2).

Line 269: Please define in methods section what is for you range (I guess scale breaks but not sure), nugget and sill. These details can be included in section 3.5. Why scale breaks are not computed?

We added the definitions of the key components of a variogram (sill, range and nugget) to the manuscript (lines 222-233). Scale breaks were considered in initial questioning but would require additional fractal analysis (outside the scope of this paper) and were not calculated. The “scale breaks” verbiage was changed to “spatial scales of snow depth variability” in the only location it was mentioned in reference to our work (line 16) but is still included in reference to other works which did calculate and define the scale breaks.

Line 272-273: If 0.5 m resolution is representative of most resolutions, you must somehow show it. Table 2 admits more information, so please include range, nugget and semivariance (average semivariance??) for all resolutions in both sites. Otherwise you cannot say that 0.5 m resolution is representative. If manuscript authors consider that this information is not needed in table 2, this information must be included in the supplementary material.

Table 2 has been updated with mean values for each resolution and location.

Line 275: I think all the information of Figure 3 is not fully described in just one sentence. For example the variogram models differences in HG, MD for the 15/01/2020 deserve some comments. Similarly why this marked difference in 20 m resolution the 17-03-2020? Provide more detailed comments on this figure.

Considering Figure 4 (formerly Figure 3), we added “These results reflect the given substratum of the two sites. The meadow’s more homogenous ground cover and topography are reflected in less variability overall and spatial autocorrelation over greater distances. In contrast, the steep rocky terrain of the Hourglass is reflected in the more dynamic seasonal patterns of spatial variability and shorter distances of autocorrelation. The 20 m resolution variograms frequently misrepresent the spatial variability patterns of finer resolutions and this is perhaps due to the relatively small study sites creating far fewer point pairs of snow depths to calculate the variograms from, therefore being less resistant to outliers.” (Sec. 4.2, lines 310-315).

Line 289: “the greatest variability” in what? Between the scale breaks, between the resolutions?

Updated to read: “the greatest semivariance values exist earlier in the winter at both the Hourglass and meadow at all resolutions” (line 331).

Line 308: In HG, I would say that for 10 out of the 11 snow depth observations, 1m resolution has a range close to that of 0.5, 0.25 m. In the worst case, only for one date (the third acquisition on February) the range value is close to that of 1m, 2.5 m... This is not a difference of 25-75 % of the observation dates. This result does not fully support one of the major outcomes of this research: 1 m is not enough to capture snow depth spatial distribution. This happens in some cases from my understanding of your results.

The 1 m resolution range values on 21 Feb and both May observations days is quite different than 0.5 m resolution range values (Figure 6) which results in different ranges on 27% of days observed in the Hourglass (3 of 11). We updated the text to clarify the specific instances where 1 m resolution does not represent the higher resolution patterns (lines 349-352). Snow depth spatial variability patterns on most days are captured by 1 m

resolution sampling strategies quite well, but we clearly see that it doesn't capture all instances of spatial variability at our site. Therefore, we recommend the coarsest resolution which captures all finer resolution patterns of spatial variability, 0.5 m, as a minimum sampling resolution.

Line 321: Show in a new figure or table CV coefficients for all resolutions. This might justify that the "coefficients of variations were similar across a variety of snow depth DSM resolutions" and also will justify why you choose 0.5 m resolution choice.

We updated Figure 8 (formerly Figure 7) with CV results from all resolutions.

Line 346-350: You cannot argue that your results suggest that elevation is the most significant variable and justify that the natural elevation gradient runs parallel to the dominant wind direction. I encourage manuscript authors to compute directional variograms for 8 distinct angular windows. In the contrary I consider this point cannot be fully discussed here.

We revised the sentence to more clearly reflect discussion on finding elevation as the most significant predictor for directional bias in our dataset and removed mention of wind direction from our results (lines 391-392).

Line 355: In view to results of figure 3, 4 and 5, I do not agree with this statement. Some days 0.5 captures well the spatial variability, yes, but for many days also 1m and even 2.5 m.

Snow depth spatial variability patterns on most days are captured by 1 m resolution sampling strategies quite well, but we clearly see that it doesn't capture all instances of spatial variability at our site. Therefore, we recommend the coarsest resolution which captures all finer resolution patterns of spatial variability, 0.5 m, as a minimum sampling resolution. We have revised the sentences to clarify our findings and discussion (lines 396-340).

Line 359: I think that conclusions about range values between the different resolution cannot be based on the average calculations (figure 4 and 6). These are important but, it must be underlined that for many dates (see figure 5) range and sill or resolutions from 0.02 to 1 and sometimes 2.5m are quite close.

We updated the text to clarify that 1 and 2.5 m resolution models have similar ranges on some observation days and provided further clarification of average range values (Table 2 and lines 402-405).

Line 362: In view to previous comments, I do not agree with the statement about 0.5 m resolution. This resolution is needed to capture small-scale spatial variability for certain dates, but in most of them, 1 m (and for some of them 2.5 m) is enough to capture the spatial variability in complex terrain (HG).

We updated lines 396-400 and 405-407 to clarify these findings are for our study site and that 0.5 m resolution is the coarsest resolution required to capture all small-scale variability. Most dates' snow depth spatial variability patterns are captured by 1 m resolution sampling strategies quite well (7 of 11), but we clearly see that it doesn't capture all instances of spatial variability at our site. Therefore, we recommend the coarsest resolution which captures all finer resolution patterns of spatial variability, 0.5 m, as a minimum sampling resolution.

Also I think you cannot extend your results to “complex terrain” you are covering a domain with very particular characteristics, a steep couloir.

We agree that complex terrain is challenging to effectively prove as broadly representative and have clarified our language throughout the paper to specify the complex terrain within our study site (lines 20, 89, 396, 407, 428, 456, 469, 472).

Line 372: Here you talk about scale breaks, but it is not clear if you compute these or not. Please see my comment on line 269.

Scale breaks were considered in initial questioning but would require additional fractal analysis (outside the scope of this paper) and were not calculated. The “scale breaks” verbiage was changed to “spatial scales of snow depth variability” in the only location it was mentioned (line 16).

Line 374: Which is the value of the similar consistency in less than 20 m? Can you please give the scale breaks you obtain?

We consistently found range values of the Hourglass to be  $< 20$  m throughout the winter (seen in mean range values in Table 2). We did not calculate scale breaks and have updated the manuscript to clarify this (lines 419-420).

Line 403 to 414: I consider this paragraph is not really needed. This is computation, not snow since. Please reduce this paragraph and give a (very) short overview of this point.

We shortened the paragraph to simplify the message (lines 449-454), but still believe that the exceptional amount of processing time required is relevant to discuss in light of future work.

Conclusions: Change conveniently in view to previous comments. These conclusions must be changed accordingly to the spatial resolution needed for accurately capturing snow spatial variability, which, regarding your results are in most cases 1 m and for some dates 0.5m. Moreover the conclusions must highlight that this work was conducted in a steep couloir, which is a frequent landform in complex mountain terrain but not the only landform.

We appreciate your interpretation and discussion of these findings. We have clarified throughout the results and discussion that 1 m resolution captures the patterns on most days at our site but does not for some dates (as you have stated above). Therefore, we still conclude that 0.5 m resolution sample spacing is required to capture the snow depth spatial variability within our site every single time. We updated lines 464-465 to further emphasize future research in additional mountain terrain and snow climates.

Figure 1: Include a photograph of the Meadow area to allow readers having a clear idea of differences between Hourglass couloir and the meadow area. I also encourage manuscript authors to include an intermediate map between the lower right corner USA frontiers and the topographic map. Please change figure composition and include a colored DEM of the mountain range where the location of the study site can be better observed.

We updated Figure 1 to include an overview of the Bridger Mountain Range and a photograph of the meadow research area.



Figure 3: This figure is difficult to understand. Please split it in two more rows and increase subplots size for an easier understanding.

Thank you for your suggestion on modifying Figure 4 (formerly Figure 3). We considered this suggestion at great length and modified it slightly. However, adding more rows increases the complexity of the figure. We believe the current emphasis of presenting variance over time (11 column time series) and space (2 main sites represented in the rows) is the best means of presenting these data and results. Adding more rows would create confusion and not allow the reader to view the variance differences between the two sites through time as easily. However, we modified the figure to include darker plot boundaries for each day's plot so that the x-axis values (Distance (m)) are more clearly delineated.

Figure 6: Include a legend for the colors of the points.

Although the colors were representative of the x axis resolutions because they match the color legends (color = resolution) of all other figures in the manuscript, the colors are not essential in the interpretation of Figure 7 (formerly Figure 6) and we have removed color from the plot.
